# Supplementary material for: Metatranscriptomic Analysis of the Bacterial Symbiont Dactylopiibacterium carminicum from the Carmine Cochineal Dactylopius coccus (Hemiptera: Coccoidea: Dactylopiidae)
Source: MDPI journal article supplement (doi:10.3390/life9010004), 2019-01-03
Supplement: s1 [file s1]

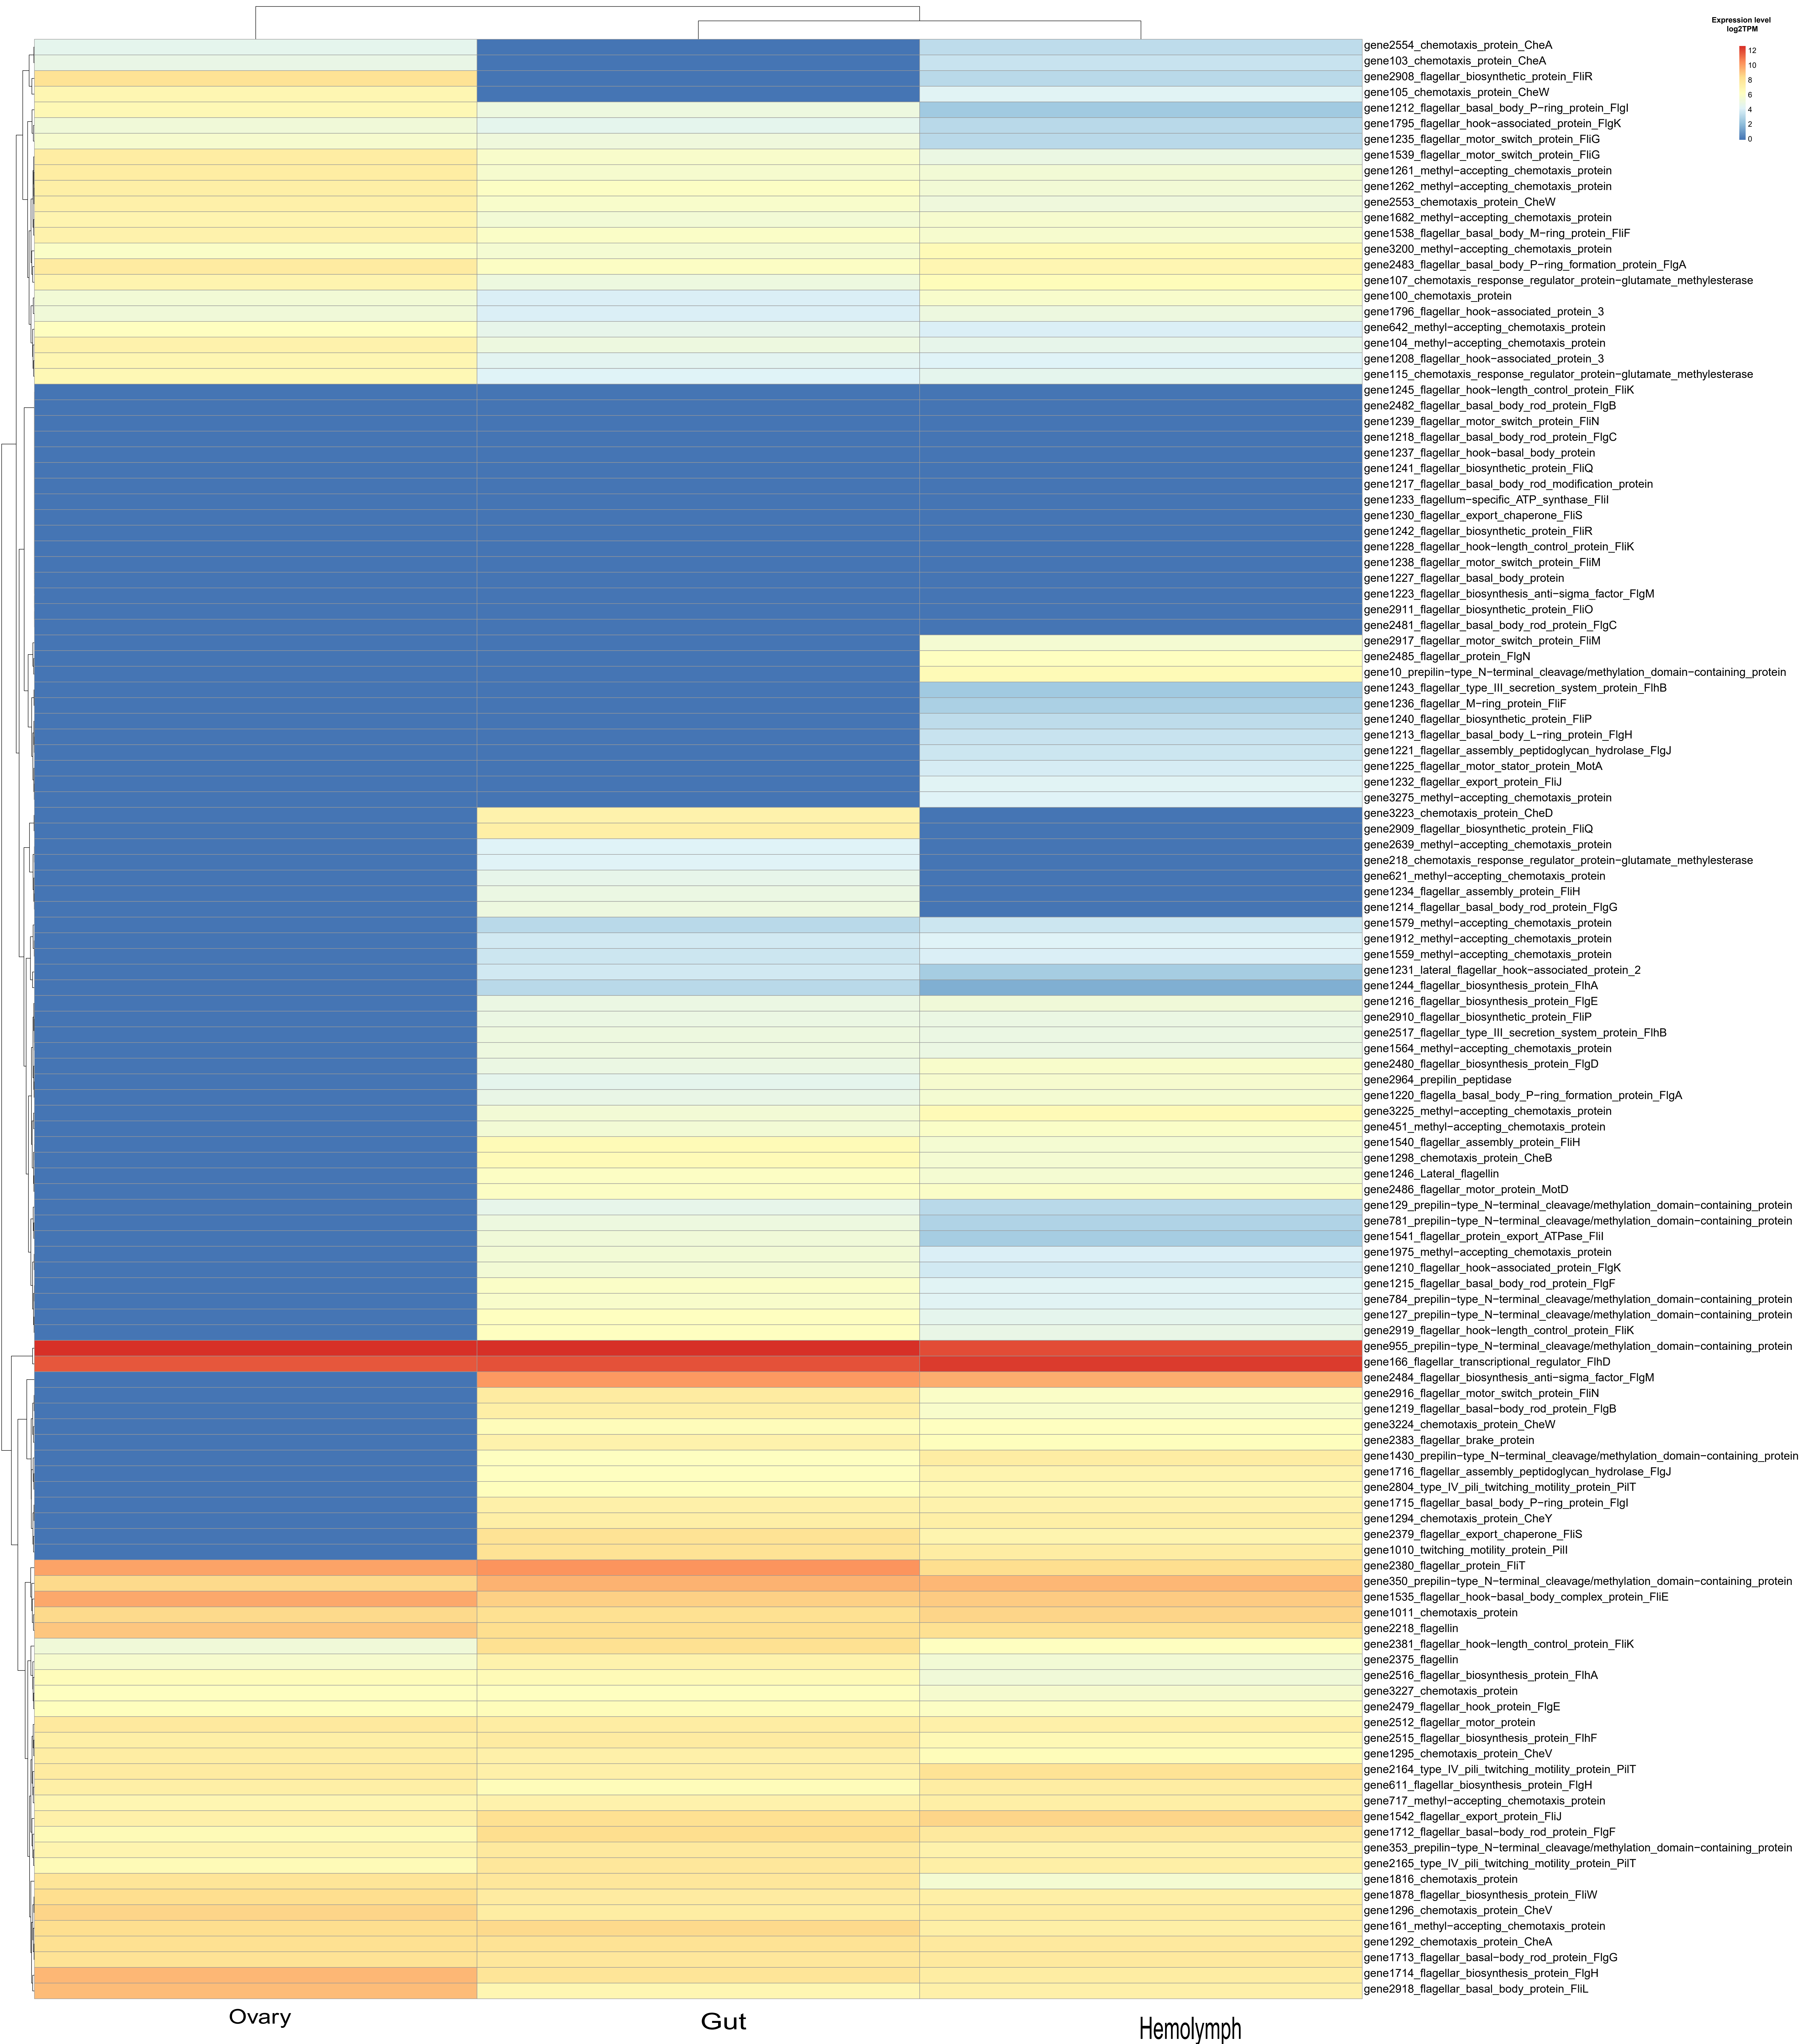

Supplementary Figure 1. Heatmap showing expression level of flagellar, pili or chemotaxis genes.
